# Supplementary material for: Acute Exposure to Diesel Exhaust Increases Muscle Sympathetic Nerve Activity in Humans
Source: PubMed Central journal article supplement — J Am Heart Assoc. 2021 May 4;10(10):e018448. doi: 10.1161/JAHA.120.018448 (PMC8200707; doi:10.1161/jaha.120.018448), 2021-05-04

# **SUPPLEMENTAL MATERIAL**

**Figure S1. Percentage difference from mask baseline (dash line) for A, MSNA frequency (bursts/min); B, MSNA incidence (bursts/100hb); C, Number of normalised bursts with burst amplitude greater than 50% of the maximum burst; and D, Number of normalised bursts with burst area greater than 50% of the maximum burst area.**

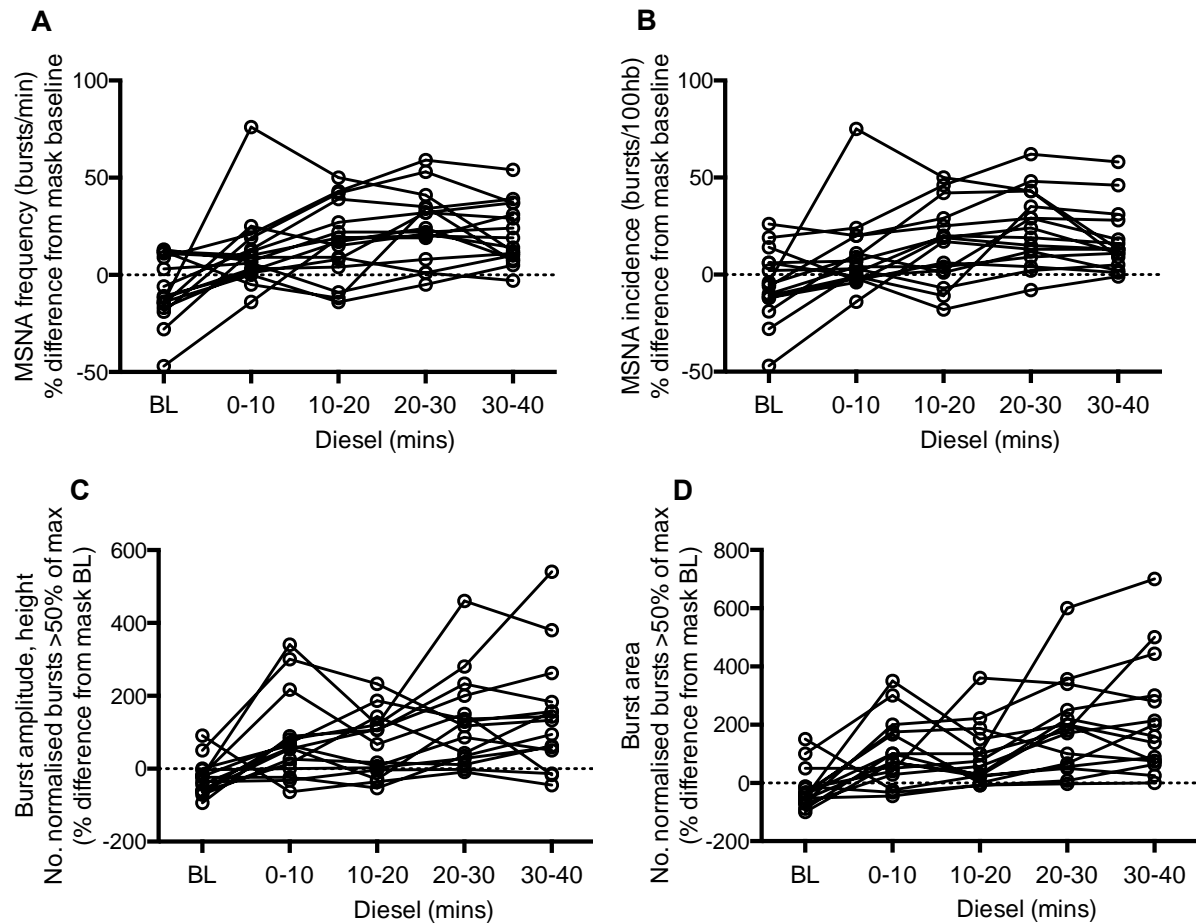

**Figure S2. Scatter plots to assess the relationship between the length of time subjects sat still, semi-supine (hours) and A, MSNA frequency; B, MSNA incidence; C, MSNA burst amplitude (% of bursts >50% of maximum); D, MSNA burst area (% of bursts >50% of maximum); E, MSNA frequency, % difference from mask baseline; F, MSNA incidence, % difference from mask baseline; G, MSNA burst amplitude (number of bursts >50% of maximum), % difference from mask baseline; H, MSNA burst area (number of bursts >50% of maximum), % difference from mask baseline.**

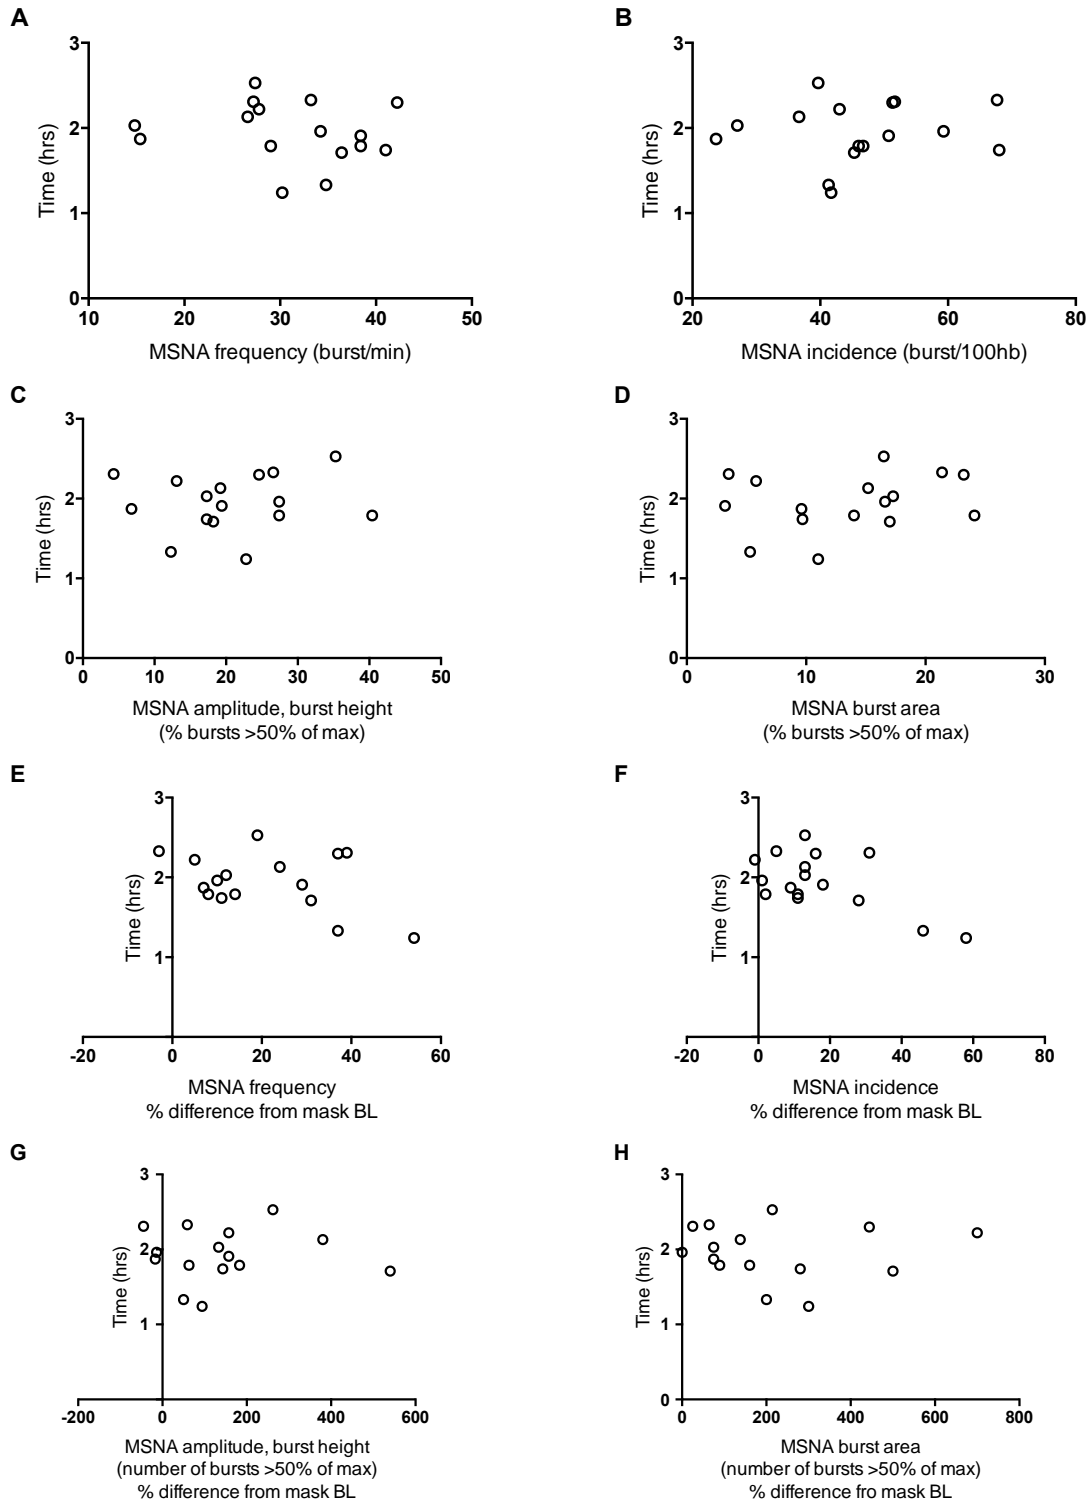

**Figure S3. Changes in A, SDNN (Log); and C, Systolic blood pressure during exposure to dilute diesel exhaust. Bars represent mean 95% CI. Difference between the means with 95% CI are shown for each time point for B, SDNN; and D, Systolic blood pressure.**

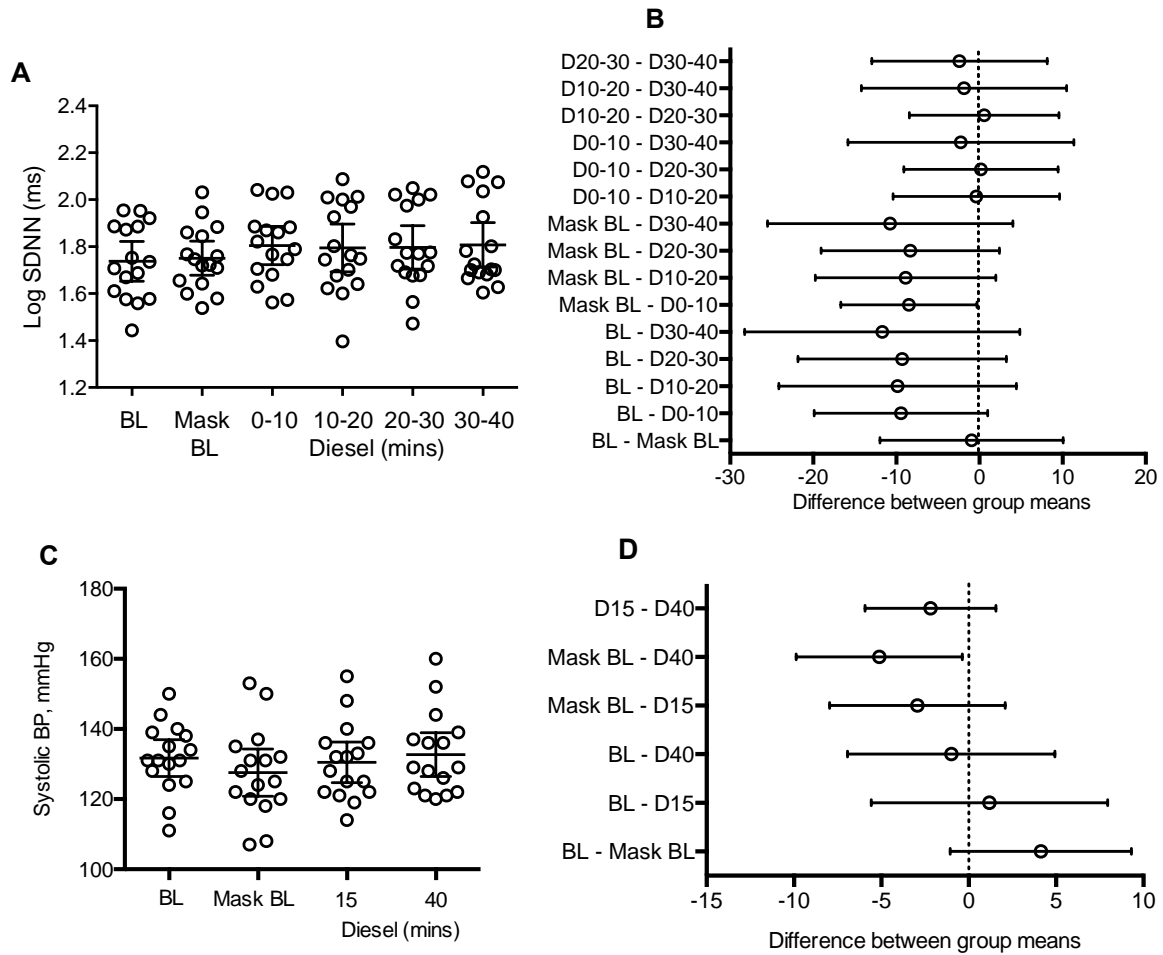

Supplement: JAH3-10-e018448-s001.pdf [file JAH3-10-e018448-s001.pdf]
